# Supplementary material for: Whole body metabolism is improved by hemin added to high fat diet while counteracted by nitrite: a mouse model of processed meat consumption
Source: Royal Society of Chemistry journal article supplement (doi:10.1039/d1fo01199e), 2021-01-01
Supplement: d1fo01199e1.pdf [file d1fo01199e1.pdf]

## Electronic Supplementary Information

### **Whole body metabolism is improved by hemin added to high fat diet while counteracted by nitrite: a mouse model of processed meat consumption.**

Diana Abu-Halaka<sup>a</sup>, Ofer Gover<sup>a</sup>, Einat Rauchbach<sup>a</sup>, Shira Zelber Sagi<sup>b</sup>, Betty Schwartz<sup>a</sup>, Oren Tirosh<sup>a\*</sup>

\*Oren.tirosh@mail.huji.ac.il

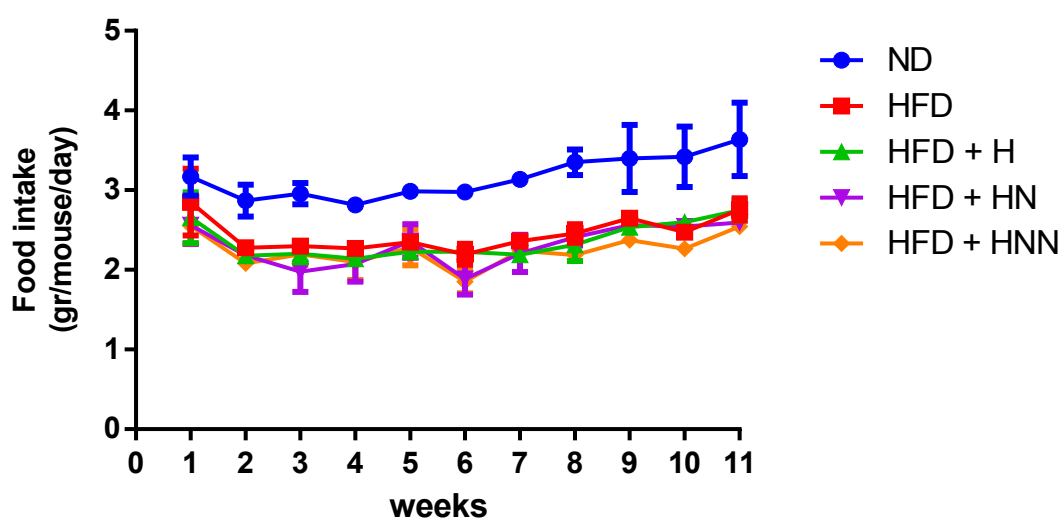

**Supplementary Figure S1.** Weekly food consumption.
